# Supplementary material for: Copper(ii) cyclam-based complexes for radiopharmaceutical applications: synthesis and structural analysis
Source: Royal Society of Chemistry journal article supplement (doi:10.1039/b615329a), 2007-01-01

## ELECTRONIC SUPPLEMENTARY INFORMATION

### Copper(II) cyclam based complexes for radiopharmaceutical applications: synthesis and structural analysis

Jon D. Silversides, Cheryll C. Allan and Stephen J. Archibald\*

- p2-4 Table S1: Structure reference codes and bond distances for six coordinate copper(II) cyclam based structures deposited in the CSD.
- p5 Figure S1: Formulae of some of the cyclam based chelators forming six-coordinate copper(II) compounds with structures deposited in the CSD.
- p6 Figure S2: The hydrogen bonded networks formed in the X-ray structures of the two  $\text{CuH}_2\text{TETA}$  complexes.
- p7 Figure S3: Histogram representing the Cu-L distances of non-macrocyclic trans donor groups from six coordinate copper(II) cyclam type X-ray structures deposited in the CSD.

TABLE S1: Structure reference codes and bond distances for six coordinate copper(II) cyclam based structures deposited in the CSD (Distances 1 to 4 represent Cu-N<sub>macro</sub> bond lengths).

| Refcode  | DIST1 | DIST2 | DIST3 | DIST4 | DIST5 | DIST6 |
|----------|-------|-------|-------|-------|-------|-------|
| AKOBEH   | 2.039 | 2.039 | 2.056 | 2.056 | 2.590 | 2.590 |
| BARWOH   | 2.007 | 2.007 | 2.011 | 2.011 | 2.475 | 2.475 |
| BIJPUG   | 2.032 | 2.032 | 2.015 | 2.015 | 2.557 | 2.557 |
| BIJTAQ   | 1.992 | 1.992 | 2.157 | 2.157 | 2.431 | 2.431 |
| BIMSOG   | 2.015 | 2.015 | 2.037 | 2.037 | 2.534 | 2.534 |
| BOJNUJ   | 1.996 | 1.996 | 2.051 | 2.051 | 2.667 | 2.667 |
| BUTYUK   | 2.011 | 2.011 | 2.005 | 2.005 | 2.940 | 2.940 |
| CEKHAB   | 2.047 | 2.047 | 2.077 | 2.077 | 2.565 | 2.565 |
| CEMCAY   | 2.005 | 1.997 | 2.047 | 2.043 | 2.505 | 2.542 |
| CESNUJ   | 2.029 | 2.029 | 1.981 | 1.981 | 2.602 | 2.602 |
| CEVMAR   | 2.045 | 2.045 | 2.090 | 2.090 | 2.503 | 2.503 |
| CEVMEV   | 2.031 | 2.031 | 2.050 | 2.050 | 2.623 | 2.623 |
| CEVQAV   | 2.032 | 2.032 | 2.055 | 2.055 | 2.691 | 2.691 |
| CEVQEZ   | 2.037 | 2.037 | 2.056 | 2.056 | 2.696 | 2.696 |
| CEVQID   | 2.041 | 2.041 | 2.045 | 2.045 | 2.725 | 2.725 |
| DEFJIH   | 2.032 | 2.032 | 2.035 | 2.035 | 2.815 | 2.815 |
| DEFJIH01 | 2.028 | 2.028 | 2.037 | 2.037 | 2.763 | 2.763 |
| DESHUE   | 2.008 | 2.010 | 2.098 | 2.054 | 2.603 | 2.535 |
| DESQAT   | 2.077 | 2.077 | 2.109 | 2.109 | 2.317 | 2.317 |
| DOHXON   | 2.010 | 2.010 | 2.015 | 2.015 | 2.515 | 2.515 |
| ECIXIX   | 2.018 | 2.004 | 1.929 | 2.008 | 2.604 | 2.509 |
| ECIXUJ   | 2.002 | 2.004 | 2.013 | 2.002 | 2.676 | 2.536 |
| EFAQOR   | 2.152 | 2.152 | 2.048 | 2.048 | 2.356 | 2.356 |
| FACFAR   | 2.025 | 2.025 | 2.009 | 2.009 | 2.602 | 2.602 |
| FACFEV   | 1.948 | 1.948 | 2.008 | 2.008 | 2.835 | 2.835 |
| FANFEF   | 2.027 | 2.027 | 2.022 | 2.022 | 2.524 | 2.524 |
| FEQLOC   | 2.019 | 2.019 | 2.048 | 2.048 | 2.595 | 2.595 |
| FERDIQ   | 2.025 | 2.025 | 2.020 | 2.020 | 2.548 | 2.548 |
| FESKOE   | 2.012 | 2.012 | 2.018 | 2.018 | 2.546 | 2.546 |
| FORMOO   | 2.428 | 2.368 | 1.994 | 2.015 | 2.004 | 2.005 |
| GEWCEQ   | 2.014 | 2.014 | 2.095 | 2.095 | 2.262 | 2.262 |
| GOXZIC   | 2.011 | 2.012 | 2.014 | 2.024 | 2.525 | 2.485 |
| GUQTIV   | 2.043 | 2.043 | 2.038 | 2.038 | 2.582 | 2.582 |
| GUTJUA   | 2.011 | 2.011 | 2.083 | 2.083 | 2.369 | 2.369 |
| HANLUD   | 2.019 | 2.019 | 2.028 | 2.028 | 2.491 | 2.491 |
| HANMEO   | 2.031 | 2.031 | 2.027 | 2.027 | 2.409 | 2.409 |
| HANMEO   | 2.017 | 2.017 | 2.026 | 2.026 | 2.502 | 2.502 |
| HAWJUK   | 2.017 | 2.017 | 2.019 | 2.019 | 2.514 | 2.514 |
| HAWKAR   | 1.996 | 1.996 | 2.014 | 2.014 | 2.439 | 2.439 |
| HAWKEV   | 2.020 | 2.020 | 2.027 | 2.027 | 2.535 | 2.535 |
| HISHEW   | 2.009 | 2.051 | 1.968 | 2.107 | 2.551 | 2.705 |
| IJAMUB   | 2.008 | 2.008 | 2.024 | 2.061 | 2.484 | 2.718 |
| IPEYUX   | 2.016 | 2.016 | 1.922 | 1.922 | 2.454 | 2.454 |
| IPEZAE   | 2.006 | 2.006 | 2.016 | 2.016 | 2.551 | 2.551 |
| ITECIT   | 2.012 | 2.034 | 2.017 | 2.008 | 2.343 | 2.736 |
| IVOMUB   | 2.010 | 2.010 | 2.044 | 2.044 | 3.072 | 3.072 |

|          |       |       |       |       |       |       |
|----------|-------|-------|-------|-------|-------|-------|
| JABSUA   | 2.013 | 2.013 | 2.013 | 2.013 | 2.484 | 2.484 |
| JUZZEJ   | 2.010 | 1.996 | 2.028 | 2.062 | 2.476 | 2.804 |
| JUZZIN   | 2.027 | 2.072 | 2.021 | 2.071 | 2.566 | 2.732 |
| JUZZOT   | 1.990 | 1.990 | 2.108 | 2.108 | 2.657 | 2.657 |
| LESCOB   | 2.014 | 2.000 | 2.011 | 2.013 | 2.618 | 2.474 |
| LEWCOF   | 2.069 | 2.069 | 2.094 | 2.094 | 2.309 | 2.309 |
| LIWMAF   | 2.022 | 2.022 | 2.038 | 2.038 | 2.696 | 2.696 |
| LIWMAG   | 2.080 | 2.080 | 2.081 | 2.081 | 2.721 | 2.721 |
| LIZTET   | 2.025 | 2.025 | 2.032 | 2.032 | 2.338 | 2.338 |
| LOJNED   | 2.029 | 2.004 | 2.024 | 2.023 | 2.925 | 2.994 |
| LOTJOT   | 2.109 | 2.109 | 2.071 | 2.071 | 2.268 | 2.268 |
| LOWCAB   | 2.016 | 2.027 | 2.014 | 2.010 | 2.660 | 2.506 |
| LOYSAT   | 2.008 | 2.008 | 2.101 | 2.101 | 2.513 | 2.513 |
| LUXMUM   | 2.035 | 2.036 | 2.029 | 2.031 | 2.371 | 2.370 |
| MEFPAO   | 2.015 | 2.015 | 2.079 | 2.079 | 2.524 | 2.524 |
| MUZTIK   | 1.999 | 2.012 | 2.018 | 1.950 | 2.485 | 2.517 |
| NOPKUY   | 2.012 | 2.012 | 2.022 | 2.022 | 2.590 | 2.590 |
| NUJVUJ   | 2.006 | 2.006 | 2.011 | 2.011 | 2.598 | 2.598 |
| NUJVUJ01 | 2.012 | 2.012 | 2.017 | 2.017 | 2.536 | 2.536 |
| NUVJET   | 2.002 | 2.008 | 2.040 | 2.103 | 2.932 | 2.809 |
| OLIYEN   | 2.013 | 2.013 | 2.013 | 2.013 | 2.499 | 2.499 |
| OMECEO   | 2.032 | 2.032 | 2.007 | 2.007 | 2.528 | 2.528 |
| PELJEV   | 2.005 | 2.005 | 2.018 | 2.018 | 2.534 | 2.534 |
| PIMFEW   | 2.056 | 2.056 | 2.108 | 2.108 | 2.248 | 2.248 |
| POTPUJ   | 2.029 | 2.029 | 2.039 | 2.039 | 2.853 | 2.853 |
| PTZDCU   | 2.016 | 2.016 | 2.024 | 2.024 | 2.567 | 2.567 |
| QOJGOL   | 2.019 | 2.021 | 2.011 | 2.021 | 2.622 | 2.693 |
| QUGKIM   | 2.030 | 2.030 | 2.039 | 2.039 | 2.505 | 2.505 |
| RAJMIZ   | 2.066 | 2.066 | 2.029 | 2.029 | 2.434 | 2.434 |
| RAXKIK   | 2.018 | 2.018 | 2.018 | 2.018 | 2.451 | 2.451 |
| RAXKOQ   | 2.012 | 2.012 | 2.016 | 2.016 | 2.506 | 2.506 |
| REYHEI   | 2.026 | 2.026 | 2.018 | 2.018 | 2.652 | 2.652 |
| REYHIM   | 2.030 | 2.030 | 2.037 | 2.037 | 2.573 | 2.573 |
| REYWEX   | 2.013 | 2.013 | 2.027 | 2.027 | 2.658 | 2.658 |
| RILTOV   | 2.042 | 2.042 | 2.093 | 2.093 | 2.286 | 2.286 |
| ROMWAR   | 2.011 | 2.011 | 2.016 | 2.016 | 2.569 | 2.569 |
| ROMWEV   | 1.997 | 1.997 | 2.013 | 2.013 | 2.544 | 2.544 |
| ROMWUL   | 2.005 | 2.005 | 2.003 | 2.003 | 2.867 | 2.867 |
| SIBFIS   | 1.985 | 1.985 | 2.001 | 2.001 | 3.163 | 3.163 |
| SUZTEM   | 2.045 | 2.045 | 2.085 | 2.085 | 2.314 | 2.314 |
| TADWAX   | 2.020 | 2.026 | 2.014 | 2.013 | 2.489 | 2.497 |
| TADWAX   | 2.013 | 2.019 | 2.012 | 2.013 | 2.505 | 2.414 |
| TAWZIA   | 1.994 | 2.007 | 2.006 | 2.025 | 2.521 | 2.689 |
| TEGPOK   | 2.023 | 2.023 | 2.016 | 2.016 | 2.953 | 2.953 |
| TEHSUU   | 2.016 | 2.016 | 2.038 | 2.038 | 2.648 | 2.648 |
| TEZREV   | 2.020 | 2.020 | 2.006 | 2.006 | 2.535 | 2.535 |
| TEZRIZ   | 2.017 | 2.026 | 2.018 | 2.041 | 2.557 | 2.640 |
| TUCQEN   | 2.020 | 2.020 | 2.027 | 2.027 | 3.193 | 3.193 |
| UFOZIY   | 2.013 | 2.013 | 2.046 | 2.046 | 2.652 | 2.652 |
| ULOLOW   | 2.008 | 2.008 | 2.042 | 2.042 | 2.551 | 2.551 |
| VAHSIH   | 2.016 | 2.016 | 2.019 | 2.019 | 2.525 | 2.525 |
| VOPSAU   | 2.096 | 2.096 | 2.070 | 2.070 | 2.368 | 2.368 |

|        |       |       |       |       |       |       |
|--------|-------|-------|-------|-------|-------|-------|
| WEQJEH | 2.032 | 2.032 | 2.083 | 2.083 | 2.406 | 2.406 |
| WOHYAT | 2.015 | 2.012 | 2.013 | 1.995 | 2.526 | 2.600 |
| WOHYEX | 2.020 | 2.021 | 2.006 | 2.014 | 2.974 | 2.680 |
| XETJAH | 2.077 | 2.077 | 2.074 | 2.074 | 2.531 | 2.531 |
| XODTOZ | 1.975 | 1.975 | 2.025 | 2.025 | 2.535 | 2.535 |
| XODTOZ | 2.016 | 2.016 | 1.976 | 1.976 | 2.546 | 2.546 |
| YHPAC  | 2.018 | 2.018 | 2.018 | 2.018 | 2.842 | 2.842 |
| YIWDOX | 2.023 | 2.023 | 2.020 | 2.020 | 2.570 | 2.570 |
| YIWFUF | 2.018 | 2.018 | 2.013 | 2.013 | 2.448 | 2.448 |
| YUMBUD | 2.007 | 2.032 | 2.032 | 2.007 | 2.754 | 2.754 |
| ZUGVAY | 2.031 | 2.031 | 2.023 | 2.023 | 2.539 | 2.539 |
| CAPVOF | 2.021 | 2.021 | 2.053 | 2.053 | 2.592 | 2.592 |
| DAPWOH | 1.996 | 1.996 | 2.013 | 2.013 | 2.528 | 2.528 |
| DAPXIC | 2.024 | 2.024 | 2.016 | 2.022 | 2.585 | 2.287 |
| DARPIW | 2.030 | 2.030 | 2.012 | 2.012 | 2.582 | 2.582 |
| DARPOC | 2.029 | 2.029 | 2.016 | 2.016 | 2.681 | 2.681 |
| DARPUI | 2.026 | 2.023 | 2.020 | 2.023 | 2.414 | 2.752 |
| TATFOK | 2.026 | 2.015 | 2.019 | 2.081 | 3.069 | 2.312 |
| YAVXID | 2.028 | 2.028 | 2.030 | 2.030 | 2.398 | 2.398 |
| JECDEB | 2.069 | 2.021 | 2.035 | 2.115 | 2.294 | 2.351 |

**Compounds included:**

all six coordinate copper(II) compounds incorporating the cyclam ring with the four nitrogens bound to the metal centre in an approximately square planar geometry. C and N alkylated structures and ligands with N-pendant arms were also included.

**Compounds excluded:**

cryptands, configurationally restricted chelators and amide backbone structures.

Figure S1: Formulae of some of the cyclam based chelators forming six-coordinate copper(II) compounds with structures deposited in the CSD.

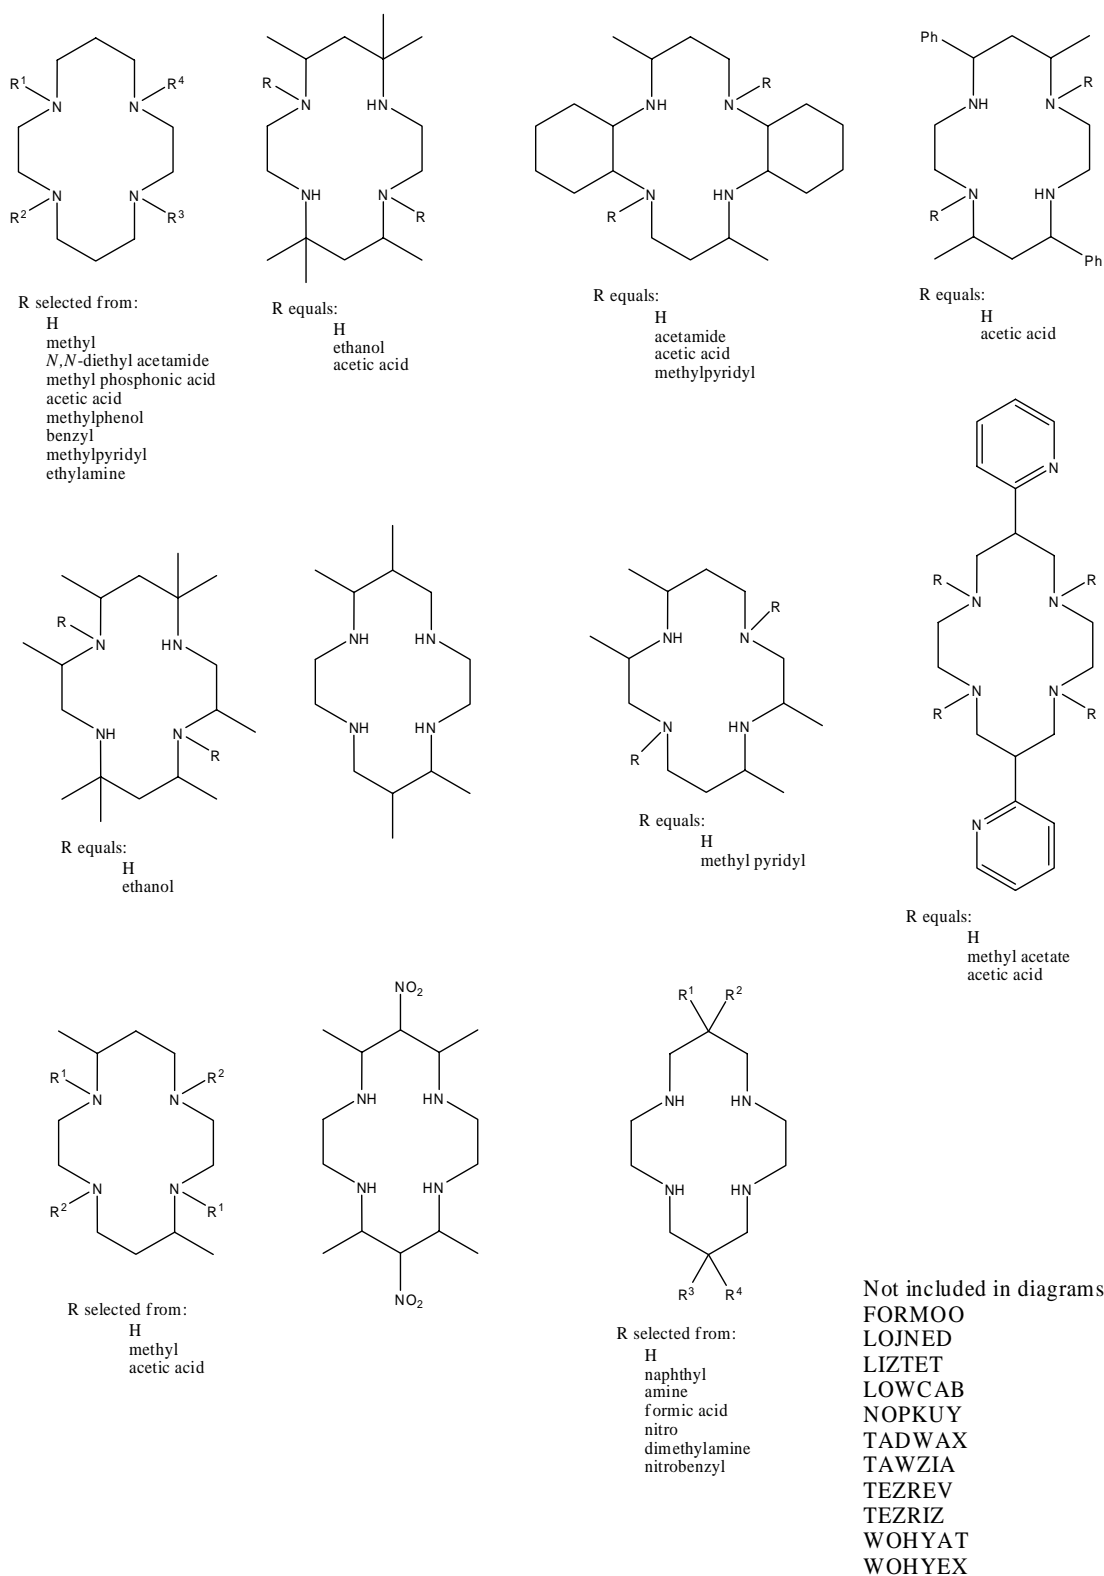

Figure S2: The hydrogen bonded networks formed in the X-ray structures of the two  $\text{CuH}_2\text{TETA}$  complexes.

(A)

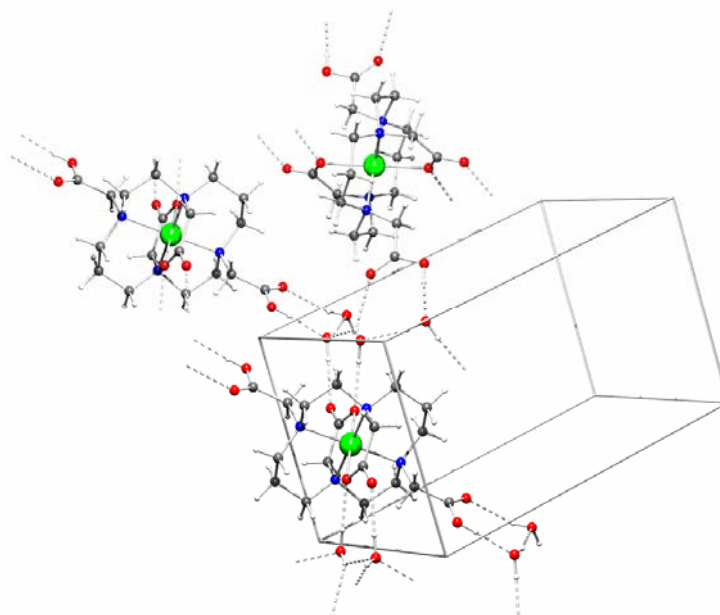

(B)

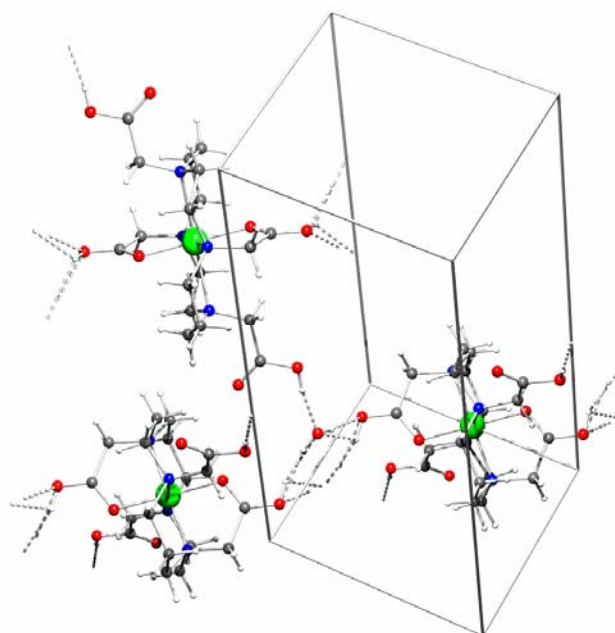

A linked network of hydrogen bonded species exists involving both the water molecules of crystallisation and the uncoordinated pendant arms, see Fig. S2. Structure (A) has four water molecules present for every complete copper macrocyclic unit (two waters per asymmetric unit). These waters H-bond to the coordinated and free carboxyl groups to form both an infinite three dimensional network and an infinite one dimensional chain within the structure. The D-H...A distances are in the range 2.587(2) to 2.973(2) Å with the shortest between a carboxyl group and a water molecule and the longest a bifurcated bond. Structure (B) has two water molecules present for every copper macrocyclic unit and also shows an infinite three dimensional H-bonded framework involving the carboxyl groups and the water molecules. This is composed of closed H-bonded rings rather than one dimensional chains. The D-H...A distances are in the range 2.628(2) Å to 2.905(2) Å. Linear and bifurcated H-bonds are present in both structures.

Figure S3: Histogram representing the Cu-L distances of non-macrocylic trans donor groups from six coordinate copper(II) cyclam type X-ray structures deposited in the CSD (see above)

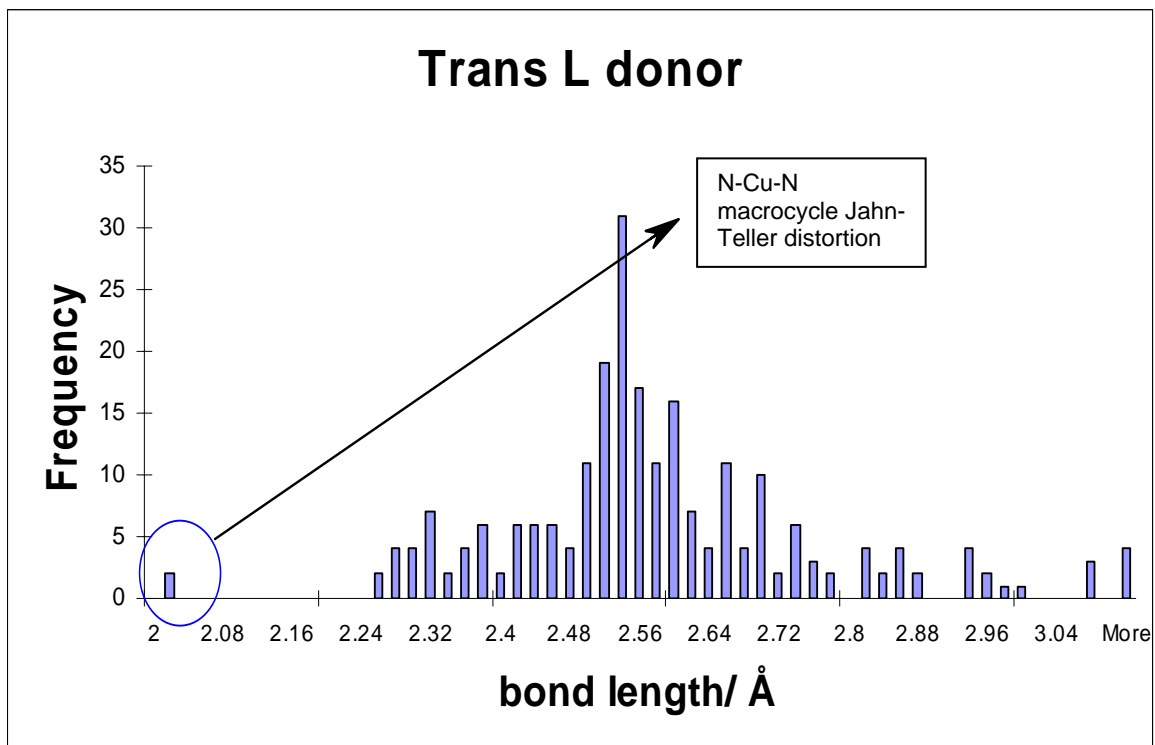

Supplement: b615329a.pdf [file b615329a.pdf]
